# Supplementary material for: Balancing the trade-offs between land productivity, labor productivity and labor intensity
Source: Springer Nature journal article supplement (doi:10.1007/s13280-023-01887-4), 2023-06-27
Supplement: MOESM1 [file 13280_2023_1887_MOESM1_ESM.pdf]

Chiarella, Cristina; Meyfroidt, Patrick; Abeygunawardane, Dilini; Conforti, Piero

**Article — Published Version**

## Balancing the trade-offs between land productivity, labor productivity and labor intensity

Ambio

**Provided in Cooperation with:**

Leibniz Institute of Agricultural Development in Transition Economies (IAMO), Halle (Saale)

*Suggested Citation:* Chiarella, Cristina; Meyfroidt, Patrick; Abeygunawardane, Dilini; Conforti, Piero (2023) : Balancing the trade-offs between land productivity, labor productivity and labor intensity, Ambio, ISSN 1654-7209, Springer Nature, Berlin, Vol. 52, Iss. 10, pp. 1618-1634, <https://doi.org/10.1007/s13280-023-01887-4> , <https://link.springer.com/article/10.1007/s13280-023-01887-4>

This Version is available at:

<https://hdl.handle.net/10419/274664>

**Standard-Nutzungsbedingungen:**

Die Dokumente auf EconStor dürfen zu eigenen wissenschaftlichen Zwecken und zum Privatgebrauch gespeichert und kopiert werden.

Sie dürfen die Dokumente nicht für öffentliche oder kommerzielle Zwecke vervielfältigen, öffentlich ausstellen, öffentlich zugänglich machen, vertreiben oder anderweitig nutzen.

Sofern die Verfasser die Dokumente unter Open-Content-Lizenzen (insbesondere CC-Lizenzen) zur Verfügung gestellt haben sollten, gelten abweichend von diesen Nutzungsbedingungen die in der dort genannten Lizenz gewährten Nutzungsrechte.

**Terms of use:**

*Documents in EconStor may be saved and copied for your personal and scholarly purposes.*

*You are not to copy documents for public or commercial purposes, to exhibit the documents publicly, to make them publicly available on the internet, or to distribute or otherwise use the documents in public.*

*If the documents have been made available under an Open Content Licence (especially Creative Commons Licences), you may exercise further usage rights as specified in the indicated licence.*

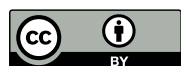

<https://creativecommons.org/licenses/by/4.0>

**Ambio**

Supplementary Information

*This supplementary information has not been peer reviewed*

Title: **Balancing the trade-offs between land productivity, labor productivity and labor intensity**

Authors: Cristina Chiarella, Patrick Meyfroidt, Dilini Abeygunawardane, Piero Conforti

## Background

Table S1 summarizes recent articles that use Integrated Assessment Models (IAMs) or other long-run analyses that weigh environmental and social outcomes.

Table S1: Review of recent literature that uses Integrated Assessment Models (IAMs) or similar to study the relationships between environmental and social outcomes

| Reference                | Title                                                                                                                               | Short summary                                                                                                                                                                                                                                                                                                                                                          |
|--------------------------|-------------------------------------------------------------------------------------------------------------------------------------|------------------------------------------------------------------------------------------------------------------------------------------------------------------------------------------------------------------------------------------------------------------------------------------------------------------------------------------------------------------------|
| Leclère et al. (2020)    | Bending the curve of terrestrial biodiversity needs an integrated strategy                                                          | Several simulation scenarios estimated through land use and biodiversity models to show how certain conservation policies and supply and demand effects could revert biodiversity loss trends by still enabling the provision of food for the human population.                                                                                                        |
| Williams et al. (2021)   | Proactive conservation to prevent habitat losses to agricultural expansion                                                          | Models of future agricultural land clearance based on historical land clearance, combined with species-specific habitat of 20k species. The paper concludes that policies should target how, where and what food is produced to prevent loss of species habitat and contribute to healthier human diets.                                                               |
| van Dijk et al. (2020)   | Stakeholder-designed scenarios for global food security assessments                                                                 | Analysis of how global food security could be affected in light of four simulated scenarios characterized by high and low levels of two dimensions: natural resources use and social equality.                                                                                                                                                                         |
| Popp et al. (2017)       | Land-use futures in the shared socio-economic pathways                                                                              | Use of IAMs for projections of possible land-use changes and their consequences for the agricultural system, food provision, prices, and greenhouse gas emissions.                                                                                                                                                                                                     |
| Springmann et al. (2018) | Options for keeping the food system within environmental limits                                                                     | Through a global food systems model, this paper simulates how expected changes in population and income levels could increase the environmental effects of the food system. Options for reducing the environmental effects are also analyzed.                                                                                                                          |
| Hasegawa et al. (2015)   | Scenarios for the risk of hunger in the twenty-first century using Shared Socioeconomic Pathways                                    | Simulation of five scenarios of the Shared Socioeconomic Pathways (SSPs) using Integrated Model CGE and analysis of how each will affect future hunger risk. These scenarios differ in terms of "sustainability", "fragmentation", and combinations of these across high and low-income countries.                                                                     |
| Wirsenius et al. (2010)  | How much land is needed for global food production under scenarios of dietary changes and livestock productivity increases in 2030? | Scenarios of global land use for 2030 to investigate the potential of land-minimized growth of food supply. The scenarios are related to: efficiency in animal production, decreased food waste, and dietary changes.                                                                                                                                                  |
| Tilman et al. (2011)     | Global food demand and the sustainable intensification of agriculture                                                               | Projections of global demand for crop production for 2050 and evaluation of the environmental impacts of different ways to meet this demand, in terms of intensification/extensification across richer and poorer nations.                                                                                                                                             |
| Adams et al. (2004)      | Biodiversity Conservation and the Eradication of Poverty                                                                            | Review of the links between poverty alleviation and biodiversity conservation. Provides a conceptual typology with four links: i) poverty and conservation are separate policy realms, ii) poverty is a critical constraint on conservation, iii) conservation should not compromise poverty reduction, iv) poverty reduction depends on living resource conservation. |
| Barrett et al. (2011)    | On biodiversity conservation and poverty traps                                                                                      | Preamble of special issue on empirical papers that explore link between biodiversity conservation and poverty traps. Papers in special issue are characterized as: i) those that explore the relationship between protected areas and poverty, and ii) new economic, social, and political approaches to achieve biodiversity conservation and social improvement.     |
| Grace et al. (2016)      | Integrative modelling reveals mechanisms linking productivity and plant species richness                                            | Provides evidence, by analysing global grassland plots, that accumulation of biomass leads to a negative effect of species richness, species richness increases productivity, and climate and soils richness increase productivity.                                                                                                                                    |
| Liang et al. (2016)      | Positive biodiversity-productivity relationship predominant in global forests                                                       | Analysis in 44 countries that shows that a loss in biodiversity leads also to a loss in forest productivity.                                                                                                                                                                                                                                                           |

## Methodology

### Data sources

Table S2 summarizes the sources of the National Household Surveys used for this analysis and compiled by the RuLIS dataset.

Table S2: National Household Surveys processed by RuLIS and used in the analysis

| Country       | Survey                                                                     | Year      | Source                                                                                                                                                                           |
|---------------|----------------------------------------------------------------------------|-----------|----------------------------------------------------------------------------------------------------------------------------------------------------------------------------------|
| Albania       | Living Standard Measurement Survey                                         | 2005      | Institute of Statistics of Albania (INSTAT)                                                                                                                                      |
| Armenia       | Integrated Living Conditions Survey                                        | 2013      | National Statistical Service of the Republic of Armenia                                                                                                                          |
| Bangladesh    | Household Income-Expenditure Survey                                        | 2010      | Bangladesh Bureau of Statistics                                                                                                                                                  |
| Bolivia       | Encuesta de los Hogares                                                    | 2008      | Instituto Nacional de Estadística - Ministerio de Planificación del Desarrollo - Bolivia                                                                                         |
| Bulgaria      | Multitopic Household Survey 2007                                           | 2007      | Gallup International                                                                                                                                                             |
| Burkina Faso  | Enquête Multisectorielle Continue                                          | 2014/15   | Institut National de la Statistique et de la Démographie - Ministère de l'Economie et des Finances                                                                               |
| Cote d'Ivoire | Enquête sur le Niveau de Vie des Ménages                                   | 2008      | Institut National De La Statistique (INS) - Ministère d'Etat, Ministère du Plan et du Développement                                                                              |
| Ecuador       | Encuesta sobre Condiciones de Vida                                         | 2014      | Instituto de Estadística y Censos                                                                                                                                                |
| Ethiopia      | Ethiopia Socioeconomic Survey                                              | 2019      | Central Statistics Agency of Ethiopia (CSA) - Ministry of Finance and Economic Development                                                                                       |
| Georgia       | Integrated Household Survey                                                | 2015      | The State Department for Statistics of Georgia - GEOSTAT                                                                                                                         |
| Ghana         | Ghana Living Standards Survey                                              | 2017      | Ghana Statistical Service (GSS)                                                                                                                                                  |
| Guatemala     | Encuesta Nacional de Condiciones de Vida                                   | 2014      | Instituto Nacional de Estadística - Gobierno de Guatemala                                                                                                                        |
| India         | India Human Development Survey                                             | 2012      | National Council of Applied Economic Research, New Delhi                                                                                                                         |
| Iraq          | The Iraq household socioeconomic survey                                    | 2012      | Organization for Statistics and Information Technology (COSIT) - Ministry of Planning, Government of Iraq                                                                        |
| Kenya         | Integrated Household Budget Survey                                         | 2005/06   | Kenya National Bureau of Statistics                                                                                                                                              |
| Kyrgyzstan    | Integrated Sample Household Budget and Labor Survey                        | 2013      | National Statistical Committee of the Kyrgyz Republic - NSC                                                                                                                      |
| Malawi        | Third Integrated Household Survey                                          | 2020      | National Statistical Office (NSO) - Ministry of Economic Planning and Development (MoEPD)                                                                                        |
| Mali          | Enquête Agricole de conjoncture intégrée aux Conditions de Vie des Ménages | 2017      | Cellule de Planification et de Statistiques - Ministère du Développement Rural Institut National de la Statistique - Gouvernement du Mali - Direction Nationale de l'Agriculture |
| Mozambique    | Inquérito sobre Orçamento Familiar                                         | 2009      | Direção de Censos e Inquéritos - Instituto Nacional de Estadística (INE) - Ministry of Planning and Development                                                                  |
| Nepal         | Nepal Living Standards Survey                                              | 2011      | Instituto Nacional de Estadística y Geografía                                                                                                                                    |
| Nicaragua     | Encuesta Nacional de Hogares sobre Medición de Nivel de Vida               | 2014      | National Bureau of Statistics                                                                                                                                                    |
| Niger         | National Survey on Household Living Conditions and Agriculture             | 2014      | Survey and Census Division - National Institute of Statistics                                                                                                                    |
| Nigeria       | General Household Survey                                                   | 2019      | National Bureau of Statistics (NBS)                                                                                                                                              |
| Pakistan      | Pakistan Social and Living Standards Measurement Survey                    | 2013/2014 | Federal Bureau of Statistics - Government of Pakistan                                                                                                                            |
| Panama        | Encuesta de Niveles de Vida                                                | 2008      | Instituto Nacional de Estadística y Censo (INEC)                                                                                                                                 |
| Peru          | Encuesta Nacional de Hogares                                               | 2019      | Instituto Nacional de Estadística e Informática - República del Perú                                                                                                             |
| Rwanda        | Integrated Household Living Conditions Survey                              | 2014      | National Institute of Statistics of Rwanda - Ministry of Finance and Economic Planning                                                                                           |
| Serbia        | Living Standards Measurement Survey                                        | 2007      | Statistical Office of the Republic of Serbia                                                                                                                                     |
| Tanzania      | National Panel Survey                                                      | 2015      | National Bureau of Statistics                                                                                                                                                    |
| Timor-Leste   | Survey of Living Standards                                                 | 2008      | National Bureau of Statistics                                                                                                                                                    |
| Uganda        | The Uganda National Panel Survey                                           | 2016      | Uganda Bureau of Statistics (UBOS)                                                                                                                                               |
| Vietnam       | Household Living Standards Survey                                          | 2010      | General Statistics Office (GSO) - Ministry of Planning and Investment                                                                                                            |

Table S3 shows the main variables used in the analysis and their definition.

Table S3: Variables used in the analysis

| Variable                       | Definition                                                                                                                                   | Unit                                             |
|--------------------------------|----------------------------------------------------------------------------------------------------------------------------------------------|--------------------------------------------------|
| Labor intensity                | Total days of labor worked (family, hired and exchanged) for cropping activities by unit of farm size (cultivated)                           | Working days/ha                                  |
| Land productivity              | Total value of production from crop activities by unit of farm size (cultivated)                                                             | 2017 USD PPP/ha                                  |
| Labor productivity             | Total value of production from crop activities by total working days in crop activities                                                      | 2017 USD PPP/working days                        |
| Farm size                      | Area of cultivated land owned or cultivated by the household in ha                                                                           | ha                                               |
| Labor costs                    | Total expenditure for labor input for crop production on the last 12 months by unit of farm size (arable or permanent)                       | 2017 USD PPP/HA                                  |
| Family labor                   | Proxied by the number of HH members between 15 and 60 years old                                                                              | Number of HH members                             |
| Seed costs                     | Sum of total expenditure on seeds and on improved seeds                                                                                      | 2017 USD PPP                                     |
| Other input costs              | Sum of total expenditure on chemicals and on inorganic fertilizer                                                                            | 2017 USD PPP                                     |
| Mechanized equipment owned     | Dummy for households owning mechanized equipment for farm activities                                                                         | Dummy variable                                   |
| Irrigation                     | Dummy for household using irrigation on cultivated land                                                                                      | Dummy variable                                   |
| Tropical livestock units (TLU) | Total livestock number expressed in tropical livestock units                                                                                 | Number of TLUs                                   |
| Education of HH head           | Years of education of the HH head                                                                                                            | Number of years                                  |
| Age of HH head                 | Age of the HH head in years                                                                                                                  | Number of years                                  |
| HH composition                 | Household composition categories (1 – only female adults, 2 – only male adults, 3 – male and female adults)                                  | Categorical variable included as dummy variables |
| Urban                          | Urban dummy (0 – rural, 1 – urban)                                                                                                           | Dummy variable                                   |
| Electricity                    | HH with access to electricity (0 – no electricity, 1 – electricity)                                                                          | Dummy variable                                   |
| Running water                  | HH with water piped into the dwelling                                                                                                        | Dummy variable                                   |
| Owns home                      | Dwelling owned by the household                                                                                                              | Dummy variable                                   |
| Toilet                         | HH has access to improved sanitation facilities                                                                                              | Dummy variable                                   |
| Livestock production           | HH engages in livestock production during prior 12 months                                                                                    | Dummy variable                                   |
| Social assistance              | At least one HH member received social assistance transfers (cash, in-kind, public transfers, fee waivers, subsidies) in the prior 12 months | Dummy variable                                   |
| Shocks                         | HH experienced weather, market price-related or disease related shocks in the prior 12 months                                                | Dummy variable                                   |
| Credit                         | HH received any loan in the prior 12 months                                                                                                  | Dummy variable                                   |
| Off-farm income                | Total HH income derived from off-farm activities (non-ag self-employment, wages, transfers and other income)                                 | 2017 USD PPP                                     |



## Results

### Descriptive statistics

Table S4 shows country median values of labor intensity (in number of days per ha) and land productivity (in USD in 2017 PPP per ha). This is the information behind Figure 2A in the manuscript.

Table S4: Labor intensity and land productivity by farm size category

| Country      | Farm size category |                            |                 |                          |                 |                          |                 |                           |                 |                          |
|--------------|--------------------|----------------------------|-----------------|--------------------------|-----------------|--------------------------|-----------------|---------------------------|-----------------|--------------------------|
|              | Labor intensity    | 0.2-1 ha Land productivity | Labor intensity | 1-2 ha Land productivity | Labor intensity | 2-5 ha Land productivity | Labor intensity | 5-20 ha Land productivity | Labor intensity | 20 ha+ Land productivity |
| All          | 885.7              | 2735.7                     | 302.2           | 1082.8                   | 131.6           | 507.4                    | 56.9            | 308.1                     | 17.5            | 196.9                    |
| Burkina Faso | 183.7              | 503                        | 151.8           | 429.7                    | 114.7           | 369.5                    | 80.6            | 260.6                     | 47.1            | 99.3                     |
| Ethiopia     | 367.7              | 1769.7                     | 177.1           | 1138.7                   | 134.7           | 797.8                    | 125.6           | 565.4                     |                 |                          |
| India        | 1014.7             | 4854.3                     | 404.1           | 2814.8                   | 258.5           | 1158.1                   | 140.6           | 414.7                     |                 |                          |
| Malawi       | 944                | 650.4                      | 635.3           | 425.5                    | 480.9           | 256.9                    | 163.9           | 107.4                     |                 |                          |
| Mali         | 180.9              | 2053.8                     | 92.4            | 1065.3                   | 57.6            | 669.3                    | 39.5            | 520                       | 29.6            | 380                      |
| Niger        | 166.8              | 675.2                      | 82.5            | 237.2                    | 52.8            | 137                      | 33.9            | 72.7                      | 17.4            | 32.6                     |
| Nigeria      | 387.5              | 1877.5                     | 165.7           | 1207.2                   | 100.7           | 801.1                    | 48.1            | 407.7                     | 4               | 210.6                    |
| Panama       | 112.6              | 916                        | 60.3            | 579.6                    | 41.8            | 598.5                    | 13.8            | 387                       | 3.6             | 65.7                     |
| Tanzania     | 229.2              | 537.2                      | 127.4           | 381.4                    | 78.8            | 238.4                    | 49.7            | 121.2                     | 14.6            | 57.6                     |
| Uganda       | 437.8              | 1233.4                     | 259.5           | 696.2                    | 185.6           | 433.4                    | 92.7            | 154.3                     |                 |                          |

Notes: Table shows the information used for figure 2A in the manuscript. Labor intensity in number of days per ha, and land productivity in USD per ha, PPP 2017.

### Land productivity

Tables S5-S7 show the full results of the linear estimation of cultivated land size and cultivated land size squared on land productivity for the pulled sample of countries and for each of the countries of the analysis. The inverse-relationship holds for all countries, but for all countries there is also a U-shaped relationship, where the average turning point is 44 ha (and a median of 11ha), but ranges from 2 ha (for Albania) to 77 ha (for Côte d'Ivoire)<sup>1</sup>

<sup>1</sup>To obtain the turning points, we follow the simple first order differentiation of the quadratic equation:  $\delta(\beta_1 A_{ic} + \beta_2 A_{ic}^2) / \delta A_{ic} = 0$ , holding other characteristics constant.

Table S5: Effects of land size on land productivity, Part I

|                              | All                | Albania            | Armenia            | Bangladesh         | Bolivia            | Bulgaria           | Burkinafaso        | CotedIvoire        | Ecuador            | Ethiopia           | Georgia            |
|------------------------------|--------------------|--------------------|--------------------|--------------------|--------------------|--------------------|--------------------|--------------------|--------------------|--------------------|--------------------|
| Cultivated land size         | -0.23***<br>(0.00) | -1.90***<br>(0.14) | -0.60***<br>(0.03) | -0.25***<br>(0.02) | -0.60***<br>(0.05) | -1.30***<br>(0.08) | -0.13***<br>(0.01) | -0.10***<br>(0.00) | -0.38***<br>(0.02) | -0.59***<br>(0.10) | -0.41***<br>(0.04) |
| Cultivated land size squared | 0.00***<br>(0.00)  | 0.47***<br>(0.06)  | 0.03***<br>(0.00)  | -0.00<br>(0.00)    | 0.01***<br>(0.00)  | 0.12***<br>(0.02)  | 0.00***<br>(0.00)  | 0.00***<br>(0.00)  | 0.01***<br>(0.00)  | 0.06***<br>(0.02)  | 0.00***<br>(0.00)  |
| HH size                      | 0.02***<br>(0.00)  | 0.02<br>(0.01)     | 0.03***<br>(0.01)  | -0.00<br>(0.00)    | 0.06*<br>(0.04)    | 0.15***<br>(0.04)  | 0.03***<br>(0.00)  | 0.04***<br>(0.00)  | -0.01<br>(0.01)    | 0.02<br>(0.02)     | 0.01<br>(0.03)     |
| Education                    |                    |                    |                    |                    |                    |                    |                    |                    |                    |                    |                    |
| HHhead                       | 0.01***<br>(0.00)  | 0.02***<br>(0.01)  | -0.00<br>(0.01)    | 0.00<br>(0.00)     | -0.00<br>(0.02)    | -0.00<br>(0.01)    | -0.00<br>(0.01)    | 0.00<br>(0.00)     | -0.01<br>(0.00)    | -0.01<br>(0.01)    | -0.00<br>(0.01)    |
| Age                          |                    |                    |                    |                    |                    |                    |                    |                    |                    |                    |                    |
| HHhead                       | -0.00**<br>(0.00)  | 0.00<br>(0.00)     | 0.00<br>(0.00)     | -0.00<br>(0.00)    | 0.00<br>(0.01)     | -0.02***<br>(0.00) | -0.00***<br>(0.00) | 0.00*<br>(0.00)    | -0.00<br>(0.00)    | -0.00<br>(0.00)    | -0.00<br>(0.00)    |
| Only male adults             | 0.11**<br>(0.04)   | -0.37<br>(0.32)    | -0.05<br>(0.14)    | -0.11<br>(0.11)    | 0.16<br>(0.34)     | 0.08<br>(0.26)     | 0.40***<br>(0.09)  | 0.13**<br>(0.07)   | 0.14**<br>(0.07)   | 0.86***<br>(0.20)  | -0.02<br>(0.21)    |
| Male female adults           | 0.18***<br>(0.02)  | -0.25<br>(0.25)    | 0.14<br>(0.10)     | 0.05<br>(0.04)     | 0.21<br>(0.21)     | 0.35**<br>(0.15)   | 0.39***<br>(0.04)  | 0.29***<br>(0.05)  | 0.08*<br>(0.05)    | 0.43***<br>(0.16)  | 0.25*<br>(0.15)    |
| Urban                        | -0.10***<br>(0.02) | 0.02<br>(0.11)     | 0.20**<br>(0.09)   | 0.03<br>(0.03)     | 0.03<br>(0.39)     | -0.36***<br>(0.11) | -0.10***<br>(0.03) | -0.26***<br>(0.05) | -0.12***<br>(0.04) | 0.00<br>(.)        | -0.16<br>(0.17)    |
| Electricity                  | 0.08***<br>(0.02)  | 0.00<br>(.)        | -0.30<br>(0.22)    | 0.14***<br>(0.02)  | -0.21<br>(0.15)    | 0.00<br>(.)        | 0.09***<br>(0.03)  | 0.01<br>(0.03)     | 0.05<br>(0.15)     | 0.11<br>(0.08)     | -0.60***<br>(0.17) |
| Running water                | 0.09***<br>(0.02)  | -0.14***<br>(0.05) | 0.08<br>(0.10)     | -0.11<br>(0.09)    | -0.98**<br>(0.39)  | -0.05<br>(0.23)    | -0.25***<br>(0.08) | -0.02<br>(0.03)    | -0.19***<br>(0.04) | -2.26***<br>(0.28) | 0.22***<br>(0.08)  |
| Owens home                   | 0.10***<br>(0.03)  | -0.05<br>(0.19)    | 0.04<br>(0.27)     | 0.24***<br>(0.05)  | 0.03<br>(0.25)     | 0.56**<br>(0.25)   | -0.11***<br>(0.04) | 0.13***<br>(0.03)  | 0.03<br>(0.04)     | -0.08<br>(0.19)    | 0.34<br>(0.28)     |
| Toilet                       | 0.05***<br>(0.01)  | 0.03<br>(0.05)     | 0.27***<br>(0.04)  | 0.00<br>(0.02)     | -0.13<br>(0.15)    | -0.17*<br>(0.10)   | 0.01<br>(0.02)     | 0.03<br>(0.10)     | 0.07<br>(0.05)     | -0.14*<br>(0.08)   | 0.20<br>(0.14)     |
| Livestock prod.              | 0.07***<br>(0.01)  | 0.09<br>(0.15)     | -0.12***<br>(0.04) | -0.02<br>(0.03)    | 0.49<br>(0.34)     | 0.20*<br>(0.11)    | 0.06***<br>(0.02)  | 0.07**<br>(0.03)   | -0.03<br>(0.32)    | 0.73***<br>(0.18)  | -0.03<br>(0.14)    |
| Off-farm income              | -0.00<br>(0.00)    | 0.00***<br>(0.00)  | -0.00<br>(0.00)    | 0.00<br>(0.00)     | -0.00<br>(0.00)    |
| Country fixed effects        | ✓                  |                    |                    |                    |                    |                    |                    |                    |                    |                    |                    |
| R <sup>2</sup>               | 0.62               | 0.35               | 0.51               | 0.18               | 0.45               | 0.46               | 0.17               | 0.24               | 0.35               | 0.19               | 0.10               |
| N                            | 120394             | 1295               | 1309               | 4010               | 387                | 796                | 7153               | 5647               | 7559               | 672                | 1709               |

Notes: Standard errors in parentheses  
\*<sub>p</sub> < 0.10, \*\*<sub>p</sub> < 0.05, \*\*\*<sub>p</sub> < 0.01.

Table S6: Effects of land size on land productivity, Part II

|                              | Ghana              | Guatemala          | India              | Iraq               | Kenya              | Kyrgyzstan         | Malawi             | Mali               | Mozambique         | Nepal              | Nicaragua          |
|------------------------------|--------------------|--------------------|--------------------|--------------------|--------------------|--------------------|--------------------|--------------------|--------------------|--------------------|--------------------|
| Cultivated land size         | -0.31***<br>(0.02) | -0.34***<br>(0.02) | -0.62***<br>(0.02) | -0.22***<br>(0.01) | -1.06***<br>(0.05) | -0.49***<br>(0.03) | -0.59***<br>(0.03) | -0.10***<br>(0.01) | -0.46***<br>(0.02) | -0.30***<br>(0.02) | -0.16***<br>(0.02) |
| Cultivated land size squared | 0.01***<br>(0.00)  | 0.01***<br>(0.00)  | 0.03***<br>(0.00)  | 0.00***<br>(0.00)  | 0.11***<br>(0.01)  | 0.02***<br>(0.00)  | 0.04***<br>(0.01)  | 0.00***<br>(0.00)  | 0.03***<br>(0.00)  | 0.01***<br>(0.00)  | 0.00***<br>(0.00)  |
| HH size                      | 0.04***<br>(0.01)  | 0.01<br>(0.01)     | 0.01***<br>(0.00)  | 0.01**<br>(0.01)   | -0.00<br>(0.01)    | 0.04**<br>(0.02)   | 0.00<br>(0.01)     | 0.01*<br>(0.00)    | 0.01**<br>(0.01)   | 0.06***<br>(0.01)  | 0.04**<br>(0.02)   |
| Education HHhead             | -0.01*<br>(0.01)   | 0.01**<br>(0.00)   | 0.01***<br>(0.00)  | 0.01<br>(0.01)     | 0.04***<br>(0.00)  | 0.00<br>(0.01)     | 0.03***<br>(0.00)  | -0.00<br>(0.01)    | 0.02***<br>(0.01)  | 0.02***<br>(0.00)  | 0.01<br>(0.01)     |
| Age HHhead                   | 0.00***<br>(0.00)  | 0.00<br>(0.00)     | 0.00<br>(0.00)     | 0.00<br>(0.00)     | 0.00***<br>(0.00)  | -0.00<br>(0.00)    | 0.00***<br>(0.00)  | -0.00<br>(0.00)    | -0.00<br>(0.00)    | 0.00***<br>(0.00)  | -0.01<br>(0.00)    |
| Only male adults             | -0.14*<br>(0.08)   | 0.08<br>(0.13)     | 0.03<br>(0.13)     | -1.55***<br>(0.41) | 0.20**<br>(0.08)   | -0.05<br>(0.29)    | -0.01<br>(0.06)    | 0.03<br>(0.29)     | 0.02<br>(0.07)     | -0.31**<br>(0.15)  | 0.17<br>(0.43)     |
| Male female adults           | 0.12**<br>(0.06)   | 0.04<br>(0.10)     | 0.14***<br>(0.05)  | -0.49**<br>(0.23)  | 0.26***<br>(0.05)  | 0.02<br>(0.12)     | 0.14***<br>(0.03)  | 0.49***<br>(0.18)  | 0.15***<br>(0.04)  | 0.16***<br>(0.05)  | 0.47<br>(0.33)     |
| Urban                        | -0.35***<br>(0.05) | 0.05<br>(0.04)     | -0.02<br>(0.04)    | -0.49***<br>(0.10) | -0.30***<br>(0.08) | -0.12<br>(0.13)    | -0.03<br>(0.05)    | -0.51***<br>(0.14) | -0.09***<br>(0.03) | -0.02<br>(0.05)    | -0.02<br>(0.14)    |
| Electricity                  | 0.00<br>(.)        | 0.15***<br>(0.03)  | 0.11***<br>(0.03)  | 0.35***<br>(0.12)  | 0.06<br>(0.08)     | -0.05<br>(0.28)    | 0.18***<br>(0.05)  | 0.23**<br>(0.09)   | 0.19***<br>(0.06)  | 0.13***<br>(0.03)  | -0.04<br>(0.12)    |
| Running water                | -0.06<br>(0.10)    | 0.07**<br>(0.03)   | 0.13***<br>(0.02)  | 0.09<br>(0.06)     | 0.29***<br>(0.05)  | -0.38***<br>(0.07) | -0.10*<br>(0.05)   | 0.01<br>(0.09)     | -0.11<br>(0.07)    | 0.04<br>(0.04)     | 0.11<br>(0.14)     |
| Owns home                    | -0.04<br>(0.05)    | 0.05<br>(0.06)     | -0.14<br>(0.11)    | -0.04<br>(0.10)    | 0.03<br>(0.06)     | 0.68**<br>(0.27)   | 0.08***<br>(0.03)  | -0.26<br>(0.17)    | -0.00<br>(0.06)    | 0.33***<br>(0.13)  | -0.08<br>(0.11)    |
| Toilet                       | 0.04<br>(0.04)     | 0.02<br>(0.03)     | 0.10***<br>(0.02)  | 0.12*<br>(0.06)    | 0.03<br>(0.03)     | -0.21<br>(0.21)    | 0.04*<br>(0.02)    | -0.13**<br>(0.05)  | 0.02<br>(0.05)     | 0.17***<br>(0.04)  | -0.10<br>(0.18)    |
| Livestock prod.              | 0.25***<br>(0.04)  | 0.07**<br>(0.03)   | 0.03<br>(0.02)     | 0.03<br>(0.06)     | 0.36***<br>(0.05)  | 0.56***<br>(0.07)  | 0.23***<br>(0.02)  | -0.14*<br>(0.09)   | 0.13***<br>(0.03)  | 0.08<br>(0.06)     | 0.05<br>(0.16)     |
| Off-farm income              | -0.00***<br>(0.00) | -0.00*<br>(0.00)   | -0.00***<br>(0.00) | -0.00**<br>(0.00)  | -0.00**<br>(0.00)  | -0.00***<br>(0.00) | -0.00*<br>(0.00)   | 0.00<br>(0.00)     | -0.00<br>(0.00)    | -0.00<br>(0.00)    | 0.00<br>(0.00)     |
| $R^2$                        | 0.21               | 0.20               | 0.23               | 0.25               | 0.20               | 0.29               | 0.13               | 0.18               | 0.14               | 0.15               | 0.35               |
| N                            | 3773               | 3515               | 13303              | 2300               | 6494               | 1749               | 8280               | 2072               | 6785               | 3688               | 880                |

Notes: Standard errors in parentheses  
\* $p < 0.10$ , \*\* $p < 0.05$ , \*\*\* $p < 0.01$ .

Table S7: Effects of land size on land productivity, Part III

|                              | Niger              | Nigeria            | Pakistan           | Panama             | Peru               | Rwanda             | Serbia             | Tanzania           | TimorLeste         | Uganda             | Vietnam            |
|------------------------------|--------------------|--------------------|--------------------|--------------------|--------------------|--------------------|--------------------|--------------------|--------------------|--------------------|--------------------|
| Cultivated land size         | -0.20***<br>(0.01) | -0.38***<br>(0.03) | -0.09***<br>(0.01) | -0.17***<br>(0.02) | -0.74***<br>(0.04) | -0.55***<br>(0.02) | -0.29***<br>(0.03) | -0.32***<br>(0.02) | -1.83***<br>(0.07) | -0.69***<br>(0.06) | -1.17***<br>(0.07) |
| Cultivated land size squared | 0.00***<br>(0.00)  | 0.02***<br>(0.00)  | 0.00<br>(0.00)     | 0.00***<br>(0.00)  | 0.03***<br>(0.01)  | 0.02***<br>(0.00)  | 0.01***<br>(0.00)  | 0.01***<br>(0.00)  | 0.25***<br>(0.02)  | 0.06***<br>(0.01)  | 0.20***<br>(0.03)  |
| HH size                      | 0.01<br>(0.01)     | 0.04***<br>(0.01)  | 0.02***<br>(0.00)  | -0.03<br>(0.03)    | 0.03***<br>(0.01)  | -0.01<br>(0.01)    | 0.01<br>(0.02)     | 0.03***<br>(0.01)  | 0.04***<br>(0.01)  | 0.02**<br>(0.01)   | 0.05***<br>(0.01)  |
| Education HHhead             | -0.03*<br>(0.01)   | 0.00<br>(0.01)     | 0.00<br>(0.00)     | 0.04<br>(0.03)     | 0.01**<br>(0.00)   | 0.02***<br>(0.00)  | -0.02<br>(0.01)    | 0.02***<br>(0.01)  | -0.02***<br>(0.01) | 0.01<br>(0.01)     | 0.02***<br>(0.00)  |
| Age HHhead                   | 0.00<br>(0.00)     | -0.00*<br>(0.00)   | -0.00***<br>(0.00) | -0.00<br>(0.01)    | -0.00***<br>(0.00) | 0.00**<br>(0.00)   | -0.01*<br>(0.00)   | -0.00<br>(0.00)    | -0.01***<br>(0.00) | 0.00<br>(0.00)     | -0.00<br>(0.00)    |
| Only male adults             | 0.09<br>(0.17)     | 0.48**<br>(0.19)   | 0.36**<br>(0.15)   | 0.42<br>(0.39)     | 0.38***<br>(0.07)  | 0.20**<br>(0.08)   | 0.45**<br>(0.22)   | 0.21*<br>(0.12)    | -0.25<br>(0.16)    | 0.18<br>(0.12)     | -0.08<br>(0.17)    |
| Male female adults           | 0.14<br>(0.10)     | 0.39***<br>(0.14)  | 0.23***<br>(0.07)  | 0.24<br>(0.36)     | 0.42***<br>(0.05)  | 0.13***<br>(0.04)  | 0.47**<br>(0.19)   | 0.15**<br>(0.07)   | 0.04<br>(0.11)     | 0.21***<br>(0.07)  | 0.14**<br>(0.06)   |
| Urban                        | -0.10<br>(0.13)    | -0.32***<br>(0.09) | 0.32***<br>(0.04)  | -0.99***<br>(0.32) | -0.12***<br>(0.03) | -0.13**<br>(0.06)  | 0.07<br>(0.11)     | 0.01<br>(0.09)     | -0.12**<br>(0.06)  | -0.19**<br>(0.08)  | -0.14***<br>(0.05) |
| Electricity                  | 0.19<br>(0.13)     | 0.11*<br>(0.06)    | 0.09***<br>(0.03)  | 0.75***<br>(0.15)  | 0.16***<br>(0.04)  | 0.06<br>(0.04)     | 0.00<br>(.)        | 0.05<br>(0.11)     | -0.17***<br>(0.05) | 0.10<br>(0.12)     | 0.24***<br>(0.06)  |
| Running water                | -0.46*<br>(0.25)   | -0.30<br>(0.23)    | 0.24***<br>(0.03)  | -0.07<br>(0.18)    | 0.05<br>(0.03)     | -0.10<br>(0.08)    | 0.04<br>(0.19)     | -0.10<br>(0.06)    | 0.07*<br>(0.04)    | -0.09<br>(0.14)    | -0.00<br>(0.06)    |
| Owns home                    | 0.15<br>(0.13)     | 0.09<br>(0.07)     | 0.01<br>(0.04)     | 0.25<br>(0.29)     | 0.12***<br>(0.05)  | 0.22***<br>(0.05)  | 0.01<br>(0.19)     | 0.08<br>(0.08)     | 0.05<br>(0.06)     | 0.01<br>(0.12)     | -0.18<br>(0.18)    |
| Toilet                       | 0.38***<br>(0.08)  | -0.13**<br>(0.06)  | -0.03<br>(0.02)    | 0.20<br>(0.15)     | 0.04<br>(0.03)     | 0.13***<br>(0.03)  | 0.02<br>(0.13)     | -0.05<br>(0.06)    | 0.05<br>(0.06)     | 0.28***<br>(0.07)  | 0.16***<br>(0.03)  |
| Livestock prod.              | 0.02<br>(0.07)     | 0.22***<br>(0.06)  | 0.12***<br>(0.02)  | -0.65***<br>(0.21) | 0.18***<br>(0.05)  | 0.36***<br>(0.03)  | -0.26**<br>(0.10)  | 0.28***<br>(0.06)  | 0.02<br>(0.04)     | -0.04<br>(0.05)    | 0.09***<br>(0.03)  |
| Off-farm income              | 0.00<br>(0.00)     | 0.00<br>(0.00)     | -0.00***<br>(0.00) | -0.00*<br>(0.00)   | -0.00***<br>(0.00) | 0.00<br>(0.00)     | 0.00***<br>(0.00)  | 0.00<br>(0.00)     | 0.00<br>(0.00)     | 0.00<br>(0.00)     | -0.00**<br>(0.00)  |
| $R^2$                        | 0.32               | 0.21               | 0.20               | 0.30               | 0.38               | 0.13               | 0.31               | 0.24               | 0.52               | 0.14               | 0.23               |
| N                            | 1649               | 2346               | 4399               | 970                | 8296               | 7710               | 666                | 1759               | 2217               | 2204               | 4802               |

Notes: Standard errors in parentheses  
\* $p < 0.10$ , \*\* $p < 0.05$ , \*\*\* $p < 0.01$ .

## Labor productivity

Table S8 shows the effects of the same set of variables on labor productivity. The lack of agricultural labor information for all countries previously considered restricted the sample to only ten countries. Eight of the ten countries considered do show positive and significant effects of land size on labor productivity.

Table S8: Effects of land size on labor productivity

|                              | All                | Burkinafaso        | Ethiopia           | India              | Malawi             | Mali               | Niger              | Nigeria            | Panama             | Tanzania           | Uganda             |
|------------------------------|--------------------|--------------------|--------------------|--------------------|--------------------|--------------------|--------------------|--------------------|--------------------|--------------------|--------------------|
| Cultivated land size         | 0.10***<br>(0.01)  | 0.07***<br>(0.01)  | 0.59***<br>(0.14)  | 0.38***<br>(0.04)  | 0.20***<br>(0.04)  | 0.05***<br>(0.01)  | -0.01<br>(0.01)    | 0.21***<br>(0.03)  | 0.09***<br>(0.01)  | 0.11***<br>(0.02)  | 0.14*<br>(0.08)    |
| Cultivated land size squared | -0.00***<br>(0.00) | -0.00***<br>(0.00) | -0.11***<br>(0.03) | -0.05***<br>(0.01) | -0.03***<br>(0.01) | -0.00***<br>(0.00) | 0.00<br>(0.00)     | -0.01***<br>(0.00) | -0.00***<br>(0.00) | -0.01***<br>(0.00) | -0.03<br>(0.02)    |
| HH size                      | -0.03***<br>(0.00) | -0.01**<br>(0.00)  | -0.02<br>(0.03)    | -0.04***<br>(0.01) | -0.22***<br>(0.01) | -0.01***<br>(0.00) | -0.04***<br>(0.01) | -0.00<br>(0.01)    | -0.08***<br>(0.02) | -0.05***<br>(0.01) | -0.04***<br>(0.01) |
| Education HHhead             | 0.01***<br>(0.00)  | 0.02**<br>(0.01)   | -0.01<br>(0.02)    | 0.02***<br>(0.00)  | 0.02***<br>(0.00)  | -0.00<br>(0.01)    | -0.01<br>(0.02)    | -0.00<br>(0.01)    | 0.02<br>(0.02)     | 0.01<br>(0.01)     | 0.01<br>(0.01)     |
| Age HHhead                   | -0.00***<br>(0.00) | -0.00***<br>(0.00) | -0.01<br>(0.00)    | -0.00<br>(0.00)    | -0.01***<br>(0.00) | 0.00<br>(0.00)     | -0.00<br>(0.00)    | -0.01***<br>(0.00) | -0.00<br>(0.00)    | -0.01***<br>(0.00) | 0.00<br>(0.00)     |
| Only male adults             | 0.27***<br>(0.08)  | 0.29***<br>(0.11)  | 1.43***<br>(0.23)  | 0.05<br>(0.17)     | 0.21***<br>(0.08)  | 0.12<br>(0.34)     | -0.05<br>(0.36)    | 0.67***<br>(0.19)  | 0.22<br>(0.30)     | 0.29**<br>(0.12)   | 0.10<br>(0.12)     |
| Male female adults           | 0.08**<br>(0.04)   | 0.22***<br>(0.05)  | 0.45**<br>(0.21)   | -0.00<br>(0.07)    | 0.01<br>(0.04)     | 0.28<br>(0.22)     | 0.08<br>(0.11)     | 0.38***<br>(0.14)  | 0.07<br>(0.24)     | 0.06<br>(0.08)     | 0.06<br>(0.07)     |
| Urban                        | 0.02<br>(0.04)     | -0.07*<br>(0.04)   | 0.00<br>( )        | 0.08*<br>(0.05)    | 0.31***<br>(0.08)  | -0.11<br>(0.13)    | 0.04<br>(0.14)     | -0.13<br>(0.09)    | -0.65*<br>(0.34)   | 0.05<br>(0.09)     | -0.11<br>(0.08)    |
| Electricity                  | 0.08***<br>(0.03)  | 0.18***<br>(0.04)  | 0.28***<br>(0.09)  | 0.03<br>(0.04)     | 0.19**<br>(0.08)   | 0.24***<br>(0.09)  | 0.10<br>(0.13)     | 0.08<br>(0.06)     | 0.88***<br>(0.12)  | 0.33***<br>(0.12)  | 0.19*<br>(0.11)    |
| Running water                | 0.18***<br>(0.03)  | -0.08<br>(0.11)    | -2.06***<br>(0.26) | 0.14***<br>(0.03)  | -0.10<br>(0.10)    | 0.04<br>(0.14)     | 0.19<br>(0.24)     | 0.21<br>(0.19)     | -0.35**<br>(0.16)  | 0.04<br>(0.07)     | 0.29*<br>(0.15)    |
| Owns home                    | 0.10**<br>(0.04)   | -0.09*<br>(0.05)   | -0.11<br>(0.26)    | -0.07<br>(0.12)    | 0.05<br>(0.05)     | -0.36**<br>(0.18)  | 0.01<br>(0.17)     | 0.07<br>(0.07)     | 0.60**<br>(0.25)   | -0.05<br>(0.08)    | 0.10<br>(0.12)     |
| Toilet                       | 0.10***<br>(0.02)  | -0.07***<br>(0.03) | -0.20**<br>(0.10)  | 0.17***<br>(0.03)  | -0.02<br>(0.03)    | -0.12**<br>(0.05)  | 0.34***<br>(0.10)  | -0.09<br>(0.06)    | 0.40***<br>(0.14)  | -0.23***<br>(0.07) | 0.23***<br>(0.06)  |
| Livestock prod.              | -0.04*<br>(0.02)   | 0.05**<br>(0.02)   | 0.43**<br>(0.19)   | -0.14***<br>(0.03) | 0.04<br>(0.03)     | -0.06<br>(0.08)    | -0.16*<br>(0.09)   | 0.19***<br>(0.06)  | 0.27<br>(0.21)     | 0.18***<br>(0.06)  | -0.10*<br>(0.05)   |
| Off-farm income              | -0.00<br>(0.00)    | 0.00<br>(0.00)     | 0.00*<br>(0.00)    | -0.00<br>(0.00)    | -0.00<br>(0.00)    | 0.00<br>(0.00)     | -0.00<br>(0.00)    | 0.00<br>(0.00)     | 0.00<br>(0.00)     | 0.00<br>(0.00)     | 0.00<br>(0.00)     |
| Country fixed effects        | ✓                  |                    |                    |                    |                    |                    |                    |                    |                    |                    |                    |
| $R^2$                        | 0.16               | 0.04               | 0.15               | 0.08               | 0.14               | 0.05               | 0.05               | 0.11               | 0.22               | 0.08               | 0.04               |
| N                            | 39356              | 7047               | 662                | 13094              | 8046               | 2045               | 1611               | 2063               | 882                | 1732               | 2174               |

Notes: Standard errors in parentheses  
\* $p < 0.10$ , \*\* $p < 0.05$ , \*\*\* $p < 0.01$ .

## Labor intensity

Table S9 shows the last of the outcomes of the trade-off space regressed against farm size, again for the limited sample of countries with farm labor information. For all countries considered there is a negative and strong relationship between farm size and labor intensity.

Table S9: Effects of land size on labor intensity

|                              | All                | Burkinafaso        | Ethiopia           | India              | Malawi             | Mali               | Niger              | Nigeria            | Panama             | Tanzania           | Uganda             |
|------------------------------|--------------------|--------------------|--------------------|--------------------|--------------------|--------------------|--------------------|--------------------|--------------------|--------------------|--------------------|
| Cultivated land size         | -0.43***<br>(0.01) | -0.18***<br>(0.01) | -0.99***<br>(0.10) | -1.03***<br>(0.04) | -0.70***<br>(0.05) | -0.17***<br>(0.01) | -0.19***<br>(0.01) | -0.64***<br>(0.03) | -0.25***<br>(0.02) | -0.43***<br>(0.02) | -0.76***<br>(0.06) |
| Cultivated land size squared | 0.01***<br>(0.00)  | 0.00***<br>(0.00)  | 0.14***<br>(0.02)  | 0.10***<br>(0.01)  | 0.06***<br>(0.01)  | 0.00***<br>(0.00)  | 0.00***<br>(0.00)  | 0.04***<br>(0.00)  | 0.00***<br>(0.00)  | 0.02***<br>(0.00)  | 0.08***<br>(0.02)  |
| HH size                      | 0.05***<br>(0.00)  | 0.03***<br>(0.00)  | 0.04**<br>(0.02)   | 0.05***<br>(0.00)  | 0.22***<br>(0.01)  | 0.02***<br>(0.00)  | 0.05***<br>(0.01)  | 0.04***<br>(0.01)  | 0.00<br>(0.03)     | 0.08***<br>(0.01)  | 0.06***<br>(0.01)  |
| Education HHhead             | -0.00**<br>(0.00)  | -0.02***<br>(0.01) | 0.01<br>(0.01)     | -0.00<br>(0.00)    | 0.01**<br>(0.01)   | -0.00<br>(0.01)    | -0.02*<br>(0.01)   | 0.01<br>(0.00)     | 0.01<br>(0.02)     | 0.02**<br>(0.01)   | -0.00<br>(0.00)    |
| Age HHhead                   | 0.00***<br>(0.00)  | 0.00**<br>(0.00)   | 0.01**<br>(0.00)   | 0.00**<br>(0.00)   | 0.01***<br>(0.00)  | -0.00<br>(0.00)    | 0.00*<br>(0.00)    | 0.01***<br>(0.00)  | 0.00<br>(0.01)     | 0.01***<br>(0.00)  | 0.00<br>(0.00)     |
| Only male adults             | -0.13***<br>(0.05) | 0.06<br>(0.09)     | -0.88***<br>(0.28) | -0.07<br>(0.10)    | -0.22***<br>(0.07) | -0.09<br>(0.37)    | 0.09<br>(0.35)     | -0.29**<br>(0.12)  | 0.32<br>(0.36)     | -0.11<br>(0.10)    | 0.04<br>(0.07)     |
| Male female adults           | 0.10***<br>(0.03)  | 0.08**<br>(0.04)   | -0.14<br>(0.18)    | 0.13**<br>(0.06)   | 0.11***<br>(0.04)  | 0.22<br>(0.25)     | 0.04<br>(0.09)     | -0.06<br>(0.08)    | 0.29<br>(0.34)     | 0.10*<br>(0.06)    | 0.12**<br>(0.05)   |
| Urban                        | -0.14***<br>(0.03) | -0.08**<br>(0.04)  | 0.00<br>(.)        | -0.13***<br>(0.04) | -0.34***<br>(0.08) | -0.53***<br>(0.11) | -0.18<br>(0.11)    | -0.18***<br>(0.06) | 0.12<br>(0.34)     | -0.06<br>(0.07)    | -0.07<br>(0.05)    |
| Electricity                  | -0.00<br>(0.02)    | -0.08**<br>(0.04)  | -0.16**<br>(0.07)  | 0.07***<br>(0.02)  | -0.11<br>(0.08)    | 0.03<br>(0.08)     | 0.07<br>(0.12)     | 0.02<br>(0.04)     | -0.14<br>(0.16)    | -0.22**<br>(0.09)  | -0.16*<br>(0.10)   |
| Running water                | -0.10***<br>(0.02) | -0.16<br>(0.10)    | -0.17<br>(0.11)    | -0.05**<br>(0.02)  | -0.05<br>(0.09)    | -0.02<br>(0.09)    | -0.48***<br>(0.18) | -0.23*<br>(0.12)   | 0.11<br>(0.20)     | -0.16***<br>(0.06) | -0.49***<br>(0.11) |
| Owns home                    | 0.01<br>(0.03)     | -0.03<br>(0.04)    | 0.01<br>(0.16)     | -0.06<br>(0.07)    | 0.03<br>(0.04)     | 0.15<br>(0.14)     | 0.15<br>(0.14)     | 0.02<br>(0.05)     | -0.13<br>(0.28)    | 0.12*<br>(0.06)    | -0.14**<br>(0.06)  |
| Toilet                       | -0.06***<br>(0.02) | 0.09***<br>(0.02)  | 0.04<br>(0.07)     | -0.06**<br>(0.02)  | 0.04<br>(0.03)     | -0.02<br>(0.04)    | 0.04<br>(0.08)     | -0.06<br>(0.04)    | -0.09<br>(0.17)    | 0.13**<br>(0.05)   | 0.02<br>(0.04)     |
| Livestock prod.              | 0.10***<br>(0.02)  | -0.00<br>(0.02)    | 0.20<br>(0.13)     | 0.16***<br>(0.02)  | 0.17***<br>(0.03)  | -0.05<br>(0.07)    | 0.15**<br>(0.07)   | 0.05<br>(0.04)     | -1.00***<br>(0.20) | 0.12***<br>(0.05)  | 0.03<br>(0.04)     |
| Off-farm income              | -0.00*<br>(0.00)   | -0.00<br>(0.00)    | -0.00<br>(0.00)    | -0.00<br>(0.00)    | -0.00<br>(0.00)    | -0.00<br>(0.00)    | 0.00<br>(0.00)     | -0.00<br>(0.00)    | -0.00**<br>(0.00)  | -0.00*<br>(0.00)   | 0.00<br>(0.00)     |
| Country fixed effects        | ✓                  |                    |                    |                    |                    |                    |                    |                    |                    |                    |                    |
| $R^2$                        | 0.55               | 0.19               | 0.32               | 0.33               | 0.20               | 0.37               | 0.29               | 0.50               | 0.38               | 0.40               | 0.26               |
| N                            | 39219              | 7034               | 659                | 13040              | 7996               | 2042               | 1613               | 2054               | 884                | 1732               | 2165               |

Notes: Standard errors in parentheses  
\* $p < 0.10$ , \*\* $p < 0.05$ , \*\*\* $p < 0.01$ .

## Stochastic Production Frontier

Table S10 shows the results of the SPF estimations for the pooled sample of countries, first with a basic model that only includes the factors of production: the log of labor expenditure per ha, the number of family workers, and the log of farm size (column (1))<sup>2</sup>; in column (2) we add the log of field size as explanatory variable of the inefficiency term; in column (3) we additionally include demographic variables to the inefficiency term, column (4) adds terciles of land concentration and of the share of nonfarm labor at the regional level. Land concentration is calculated with the Herfindahl Hirschman Index (HHI), which measures the concentration of field size at the regional level. The share of nonfarm labor is calculated by adding the number of households whose primary activity is outside of agriculture (measured by less than 30% of total income coming from agriculture) relative to the total population at the regional level. Both variables are then divided in low, medium and high terciles. It should be noted that since  $i$  is the technical inefficiency term, a negative sign means a positive effect on technical efficiency.

In all specifications, the factors of production have the expected signs in most cases. Both variables for agricultural labor (labor costs per ha and family labor) increase land productivity. The stochastic frontier estimations also show

<sup>2</sup>We do not include proxies for input use or capital for the pooled sample of countries, as including these variables would decrease the sample size significantly. We do include these variables though for the country estimations when available (Table S9).

the inverse-relationship, as larger field sizes translate into lower land productivity. An increase of one percent in farm size decreases agricultural productivity per ha by 52%. Although the inverse-relationship holds, column (2), (3) and (4) show that farm size has a negative sign on the inefficiency function, meaning that an increase of farm size in fact increases technical efficiency. Once accounting for all factors of production and controlling the technical inefficiency function by demographic characteristics that may affect farm management, a greater farm size is correlated with a greater technical efficiency, or in other words, larger farms are closer to the stochastic production frontier than smaller farms.

In column (5) we add terciles for land concentration and the share of nonfarm labor at the regional level. The results show that a medium level of land concentration increases technical efficiency, but a high level of land concentration decreases technical efficiency, both relative to low levels of land concentration. A greater share of nonfarm labor at the regional level decreases technical efficiency, as expected because of the lower agricultural activity.

Table S10: Results of the Stochastic Production Frontier estimation for the pooled sample (Output variable: Log of land productivity)

|                                      | Basic model        | Basic+<br>field size<br>inefficiency function | Full specification | Full+<br>land concentration<br>and density of<br>nonfarm labor |
|--------------------------------------|--------------------|-----------------------------------------------|--------------------|----------------------------------------------------------------|
| Frontier                             |                    |                                               |                    |                                                                |
| Ln(Labor expenditure<br>2017PPP/HA)  | 0.06***<br>(0.00)  | 0.06***<br>(0.00)                             | 0.06***<br>(0.00)  | 0.06***<br>(0.00)                                              |
| Family workers/ha                    | 0.00***<br>(0.00)  | 0.00***<br>(0.00)                             | -0.00**<br>(0.00)  | 0.00<br>(0.00)                                                 |
| Ln(Field size HA)                    | -0.52***<br>(0.00) | -0.55***<br>(0.00)                            | -0.55***<br>(0.00) | -0.54***<br>(0.00)                                             |
| Mu                                   |                    |                                               |                    |                                                                |
| Ln(Field size HA)                    |                    | -0.62***<br>(0.10)                            | -0.16***<br>(0.04) | -0.07**<br>(0.03)                                              |
| Years of education<br>of the HH head |                    |                                               | 0.09***<br>(0.01)  | 0.02***<br>(0.01)                                              |
| Age of the HH head                   |                    |                                               | 0.02***<br>(0.00)  | 0.00***<br>(0.00)                                              |
| Only<br>female<br>adults             |                    |                                               | 3.17***<br>(0.25)  | 2.28***<br>(0.13)                                              |
| Only<br>male<br>adults               |                    |                                               | 2.70***<br>(0.23)  | 1.92***<br>(0.13)                                              |
| HHI land concentration<br>Medium     |                    |                                               |                    | -0.48***<br>(0.06)                                             |
| HHI land concentration<br>High       |                    |                                               |                    | 0.32***<br>(0.08)                                              |
| Share nonfarm labor<br>Medium        |                    |                                               |                    | 2.01***<br>(0.12)                                              |
| Share nonfarm labor<br>High          |                    |                                               |                    | 2.97***<br>(0.17)                                              |
| Country<br>fixed effects             | ✓                  | ✓                                             | ✓                  | ✓                                                              |
| $R^2$                                |                    |                                               |                    |                                                                |
| N                                    | 120404             | 120404                                        | 120404             | 120404                                                         |

Notes: Standard errors in parentheses  
\* $p < 0.10$ , \*\* $p < 0.05$ , \*\*\* $p < 0.01$ .

To take a closer look at whether this relationship also holds for each country, Tables S11-S13 show the same specification as column (3) above for the pooled sample, and we add proxies for input use and capital when available for each country in the sample. As proxies for input use we include the costs of seeds per ha and other input costs per ha (fertilizers and chemicals) in logs, and as proxies for capital, we include owning mechanized equipment, irrigation

use, and the number of tropical livestock. Factors of production have the expected sign for all countries: there is a positive relationship between hired and family labor and land productivity for most countries; and there is also a positive relationship between input costs and capital ownership with land productivity, significant for most countries. The inverse-relationship also holds, and it is significant for most countries considered.

Farm size has a negative and significant coefficient on the inefficiency function for Burkina Faso, Cote d'Ivoire, Ecuador, Ethiopia, Georgia, Ghana, Guatemala, India, Iraq, Kenya, Kyrgyzstan, Malawi, Mozambique, Nepal, Nigeria, Peru, Rwanda, Tanzania, Timor-Leste, and Uganda; and a positive and significant coefficient for Bangladesh, Bulgaria, and Nicaragua. For most countries considered, after accounting for all factors of production, an increase in farm size translates into an increase of the farms' technical efficiency.

Table S11: Results of the Stochastic Production Frontier estimation for each country, Part I

|                                      | All                | Albania            | Armenia            | Bangladesh         | Bolivia            | Bulgaria          | Burkinafaso        | CotedIvoire        | Ecuador            | Ethiopia           | Georgia            |
|--------------------------------------|--------------------|--------------------|--------------------|--------------------|--------------------|-------------------|--------------------|--------------------|--------------------|--------------------|--------------------|
| Frontier                             |                    |                    |                    |                    |                    |                   |                    |                    |                    |                    |                    |
| Ln(Labor expenditure<br>2017PPP/HA)  | 0.06***<br>(0.00)  | -0.00<br>(0.01)    | -0.04***<br>(0.01) | 0.03***<br>(0.00)  | 0.11***<br>(0.02)  | 0.13***<br>(0.03) | -0.01<br>(0.01)    | 0.05***<br>(0.01)  | 0.01<br>(0.01)     | 0.03***<br>(0.01)  | 0.00<br>(0.00)     |
| Family workers/ha                    | -0.00**<br>(0.00)  | -0.00<br>(0.00)    |                    | -0.00<br>(0.00)    | 0.02***<br>(0.01)  | 0.00<br>(0.00)    | 0.05***<br>(0.00)  | 0.01<br>(0.01)     | -0.01***<br>(0.00) | 0.01<br>(0.01)     | 0.00**<br>(0.00)   |
| Ln(Field size HA)                    | -0.55***<br>(0.00) | -0.72***<br>(0.05) | -0.64***<br>(0.01) | -0.09***<br>(0.03) | -0.75***<br>(0.09) | 0.24*<br>(0.14)   | -0.63***<br>(0.03) | -0.74***<br>(0.02) | -0.99***<br>(0.01) | -0.50***<br>(0.04) | -0.99***<br>(0.01) |
| Ln(Other input costs<br>2017PPP/HA)  |                    | 0.03***<br>(0.01)  |                    | 0.07***<br>(0.01)  | 0.07***<br>(0.02)  | 0.10***<br>(0.01) | 0.03***<br>(0.00)  |                    | -0.00<br>(0.01)    | 0.07***<br>(0.01)  | 0.00<br>(0.00)     |
| Owns mechanized<br>equipment         |                    | 0.10**<br>(0.04)   | 0.10**<br>(0.05)   | 0.10***<br>(0.02)  |                    | 0.70***<br>(0.14) | 0.17***<br>(0.02)  |                    | 0.07***<br>(0.02)  | 0.12<br>(0.09)     | 0.00<br>(0.01)     |
| Irrigation use                       |                    | 0.17***<br>(0.04)  | 0.23***<br>(0.02)  |                    |                    |                   |                    |                    |                    | 0.14***<br>(0.05)  |                    |
| Tropical livestock<br>units (TLU)    |                    | -0.01<br>(0.01)    | 0.00**<br>(0.00)   | -0.00<br>(0.01)    | -0.01<br>(0.01)    |                   |                    | -0.00<br>(0.00)    | -0.01***<br>(0.00) | -0.01<br>(0.01)    | 0.00*<br>(0.00)    |
| Ln(Seed costs<br>2017PPP/HA)         |                    |                    |                    | 0.03***<br>(0.01)  | -0.01<br>(0.02)    | 0.10***<br>(0.01) | -0.04***<br>(0.01) | -0.01<br>(0.01)    | 0.01<br>(0.01)     | 0.00<br>(0.01)     | -0.00*<br>(0.00)   |
| Mu                                   |                    |                    |                    |                    |                    |                   |                    |                    |                    |                    |                    |
| Ln(Field size HA)                    | -0.16***<br>(0.04) | -0.18<br>(0.50)    | -4.14<br>(5.89)    | 0.65***<br>(0.19)  | 0.08<br>(0.15)     | 1.21***<br>(0.14) | -0.79***<br>(0.04) | -0.94***<br>(0.08) | -0.16***<br>(0.03) | -1.06***<br>(0.27) | -0.73***<br>(0.06) |
| Years of education<br>of the HH head | 0.09***<br>(0.01)  | -0.12<br>(0.14)    |                    | 0.01<br>(0.01)     | 0.03<br>(0.02)     | 0.04***<br>(0.01) | 0.02**<br>(0.01)   | 0.04***<br>(0.01)  | 0.03***<br>(0.01)  |                    |                    |
| Age of the HH head                   | 0.02***<br>(0.00)  | -0.02<br>(0.03)    | -0.03<br>(0.06)    | 0.01<br>(0.00)     | 0.01<br>(0.01)     | 0.02***<br>(0.00) | 0.00<br>(0.00)     | -0.01*<br>(0.00)   | 0.00**<br>(0.00)   | -0.01**<br>(0.01)  | 0.01**<br>(0.00)   |
| Only<br>female<br>adults             | 3.17***<br>(0.25)  | -0.55<br>(1.96)    | 7.19<br>(9.90)     | 0.13<br>(0.35)     | 0.71***<br>(0.24)  |                   |                    | 0.96***<br>(0.13)  | 0.09<br>(0.07)     | 0.86***<br>(0.32)  | 0.33**<br>(0.15)   |
| Only<br>male<br>adults               | 2.70***<br>(0.23)  | 1.17<br>(2.30)     | 7.24<br>(10.07)    | 0.27<br>(0.70)     | 0.19<br>(0.33)     |                   |                    | 0.88***<br>(0.13)  | -0.13<br>(0.10)    | 0.08<br>(0.50)     | 0.69***<br>(0.21)  |
| Country<br>fixed effects             | ✓                  |                    |                    |                    |                    |                   |                    |                    |                    |                    |                    |
| $R^2$                                |                    |                    |                    |                    |                    |                   |                    |                    |                    |                    |                    |
| N                                    | 120404             | 1295               | 1420               | 4010               | 387                | 796               | 7158               | 5657               | 7559               | 1770               | 4968               |

Notes: Standard errors in parentheses  
\* $p < 0.10$ , \*\* $p < 0.05$ , \*\*\* $p < 0.01$ .



Table S12: Results of the Stochastic Production Frontier estimation for each country, Part II

|                                   | Ghana              | Guatemala          | India              | Iraq               | Kenya              | Kyrgyzstan         | Malawi             | Mali               | Mozambique         | Nepal              | Nicaragua         |
|-----------------------------------|--------------------|--------------------|--------------------|--------------------|--------------------|--------------------|--------------------|--------------------|--------------------|--------------------|-------------------|
| <b>Frontier</b>                   |                    |                    |                    |                    |                    |                    |                    |                    |                    |                    |                   |
| Ln(Labor expenditure 2017PPP/HA)  | 0.00<br>(0.00)     | 0.04***<br>(0.00)  | 0.03***<br>(0.00)  | 0.03***<br>(0.01)  | 0.00<br>(0.01)     | 0.02***<br>(0.01)  | 0.04***<br>(0.00)  | 0.06***<br>(0.01)  | 0.09***<br>(0.01)  | 0.05***<br>(0.01)  | 0.09***<br>(0.01) |
| Family workers/ha                 | 0.02***<br>(0.01)  | 0.00**<br>(0.00)   | 0.00***<br>(0.00)  | -0.01*<br>(0.00)   | -0.01***<br>(0.00) | -0.02***<br>(0.01) | 0.01***<br>(0.00)  | 0.02***<br>(0.01)  | 0.01**<br>(0.00)   | 0.02***<br>(0.01)  | 0.06***<br>(0.02) |
| Ln(Field size HA)                 | -0.82***<br>(0.03) | -0.37***<br>(0.02) | -1.18***<br>(0.03) | -1.01***<br>(0.06) | -0.87***<br>(0.05) | -1.01***<br>(0.03) | -0.51***<br>(0.02) | -0.28***<br>(0.02) | -0.58***<br>(0.03) | -0.66***<br>(0.02) | 0.23*<br>(0.14)   |
| Ln(Seed costs 2017PPP/HA)         | 0.02**<br>(0.01)   | 0.01<br>(0.01)     | 0.08***<br>(0.01)  | 0.04***<br>(0.01)  | 0.05***<br>(0.01)  | 0.01<br>(0.01)     | 0.02***<br>(0.00)  | 0.00<br>(0.01)     |                    | 0.09***<br>(0.01)  |                   |
| Ln(Other input costs 2017PPP/HA)  | 0.05***<br>(0.01)  | 0.06***<br>(0.01)  | 0.07***<br>(0.00)  | 0.13***<br>(0.01)  | 0.11***<br>(0.01)  |                    | 0.07***<br>(0.00)  | 0.07***<br>(0.01)  |                    |                    |                   |
| Owns mechanized equipment         | 0.11***<br>(0.02)  | 0.15***<br>(0.02)  | 0.13***<br>(0.01)  |                    |                    | -0.15**<br>(0.06)  | 0.09***<br>(0.03)  | 0.32***<br>(0.04)  |                    | 0.30***<br>(0.04)  | 0.07<br>(0.12)    |
| Irrigation use                    | -0.06<br>(0.09)    |                    | 0.19***<br>(0.01)  | -0.03<br>(0.06)    | 0.07<br>(0.04)     | 0.06<br>(0.04)     | 0.19***<br>(0.02)  | 0.73***<br>(0.07)  | -0.01<br>(0.04)    | 0.10***<br>(0.03)  |                   |
| Tropical livestock units (TLU)    | 0.05***<br>(0.01)  | 0.03<br>(0.02)     | 0.02**<br>(0.01)   |                    | 0.06***<br>(0.01)  | 0.04***<br>(0.01)  | 0.03***<br>(0.01)  | 0.01***<br>(0.00)  | 0.05***<br>(0.01)  | 0.02***<br>(0.00)  |                   |
| <b>Mu</b>                         |                    |                    |                    |                    |                    |                    |                    |                    |                    |                    |                   |
| Ln(Field size HA)                 | -0.96***<br>(0.06) | -0.23*<br>(0.12)   | -1.10***<br>(0.03) | -0.65***<br>(0.06) | -0.82***<br>(0.12) | -2.19***<br>(0.27) | -0.49***<br>(0.08) | -0.07<br>(0.07)    | -0.38***<br>(0.07) | -1.05***<br>(0.14) | 1.14***<br>(0.14) |
| Age of the HH head                | -0.01***<br>(0.00) | -0.01*<br>(0.01)   | -0.00***<br>(0.00) | -0.00**<br>(0.00)  | -0.01***<br>(0.00) | 0.02***<br>(0.01)  | -0.01***<br>(0.00) | -0.13<br>(0.14)    | 0.01***<br>(0.00)  | -0.01**<br>(0.00)  |                   |
| Only female adults                | 0.40***<br>(0.08)  | -0.82<br>(2.15)    | 0.05<br>(0.04)     | 0.05<br>(0.18)     | 0.56***<br>(0.14)  | 0.37<br>(0.33)     | 0.25***<br>(0.08)  | 11.94<br>(13.98)   | 0.52***<br>(0.10)  | 0.53***<br>(0.14)  | 0.53**<br>(0.23)  |
| Only male adults                  | 0.87***<br>(0.10)  | 0.00<br>(0.20)     | -0.00<br>(0.08)    | 0.40<br>(0.34)     | 0.34*<br>(0.19)    | 0.76<br>(0.81)     | 0.22<br>(0.14)     | 0.45<br>(15.96)    | 0.41***<br>(0.15)  | 1.49***<br>(0.33)  | -0.01<br>(0.29)   |
| Years of education of the HH head |                    | -0.05<br>(0.03)    | -0.02***<br>(0.00) |                    | -0.08***<br>(0.02) | 0.03<br>(0.04)     | -0.06***<br>(0.01) | 1.33<br>(1.32)     | -0.01<br>(0.01)    | -0.02<br>(0.01)    |                   |
| $R^2$                             |                    |                    |                    |                    |                    |                    |                    |                    |                    |                    |                   |
| N                                 | 6844               | 3515               | 13303              | 3278               | 6494               | 1749               | 8280               | 2072               | 6785               | 3688               | 880               |

Notes: Standard errors in parentheses  
\* $p < 0.10$ , \*\* $p < 0.05$ , \*\*\* $p < 0.01$ .

Table S13: Results of the Stochastic Production Frontier estimation for each country, Part III

|                                   | Niger              | Nigeria            | Pakistan           | Panama             | Peru               | Rwanda             | Serbia            | Tanzania           | TimorLeste         | Uganda             | Vietnam            |
|-----------------------------------|--------------------|--------------------|--------------------|--------------------|--------------------|--------------------|-------------------|--------------------|--------------------|--------------------|--------------------|
| <b>Frontier</b>                   |                    |                    |                    |                    |                    |                    |                   |                    |                    |                    |                    |
| Ln(Labor expenditure 2017PPP/HA)  | 0.08***<br>(0.01)  | 0.04***<br>(0.01)  | 0.05***<br>(0.00)  | 0.28***<br>(0.03)  | 0.07***<br>(0.00)  | 0.09***<br>(0.00)  | 0.04***<br>(0.01) | 0.08***<br>(0.01)  | 0.01***<br>(0.00)  | 0.01<br>(0.01)     | 0.05***<br>(0.00)  |
| Family workers/ha                 | -0.00<br>(0.01)    | 0.02***<br>(0.00)  | 0.02***<br>(0.00)  | 0.02<br>(0.01)     | 0.00**<br>(0.00)   | -0.01***<br>(0.00) | -0.00<br>(0.02)   | -0.02**<br>(0.01)  | -0.00***<br>(0.00) | 0.01<br>(0.01)     | 0.00***<br>(0.00)  |
| Ln(Field size HA)                 | -0.74***<br>(0.04) | -0.69***<br>(0.02) | -0.32***<br>(0.02) | -0.52***<br>(0.18) | -0.77***<br>(0.02) | -0.84***<br>(0.02) | -0.64**<br>(0.28) | -0.96***<br>(0.06) | -1.02***<br>(0.00) | -0.91***<br>(0.08) | -0.31***<br>(0.02) |
| Ln(Seed costs 2017PPP/HA)         | -0.01<br>(0.02)    | -0.03***<br>(0.01) | 0.02***<br>(0.01)  | 0.08<br>(0.06)     | -0.00<br>(0.00)    | -0.02***<br>(0.00) | -0.00<br>(0.02)   | 0.04***<br>(0.01)  | 0.05***<br>(0.00)  | -0.02**<br>(0.01)  |                    |
| Ln(Other input costs 2017PPP/HA)  | 0.10***<br>(0.02)  | 0.08***<br>(0.01)  | 0.11***<br>(0.01)  | 0.09***<br>(0.03)  | 0.06***<br>(0.00)  | 0.05***<br>(0.00)  | 0.04**<br>(0.02)  | 0.05***<br>(0.01)  | -0.04***<br>(0.00) | 0.11***<br>(0.02)  |                    |
| Owns mechanized equipment         | 0.16**<br>(0.06)   | 0.13***<br>(0.04)  |                    |                    |                    | 0.09<br>(0.06)     | 0.28***<br>(0.09) | 0.25***<br>(0.05)  | -0.01***<br>(0.00) | 0.11**<br>(0.05)   |                    |
| Irrigation use                    | 0.17<br>(0.11)     | 0.05<br>(0.10)     | 0.31***<br>(0.02)  |                    |                    | 0.21***<br>(0.02)  | 0.17**<br>(0.08)  | -0.02<br>(0.12)    | -0.09***<br>(0.00) | 0.05<br>(0.13)     |                    |
| Tropical livestock units (TLU)    | 0.01***<br>(0.00)  |                    | -0.05***<br>(0.01) | -0.01<br>(0.01)    | -0.00<br>(0.00)    | 0.15***<br>(0.01)  | 0.00<br>(0.01)    | 0.02***<br>(0.01)  | -0.01***<br>(0.00) | -0.01<br>(0.01)    |                    |
| <b>Mu</b>                         |                    |                    |                    |                    |                    |                    |                   |                    |                    |                    |                    |
| Ln(Field size HA)                 | -0.27<br>(0.20)    | -0.88***<br>(0.08) | -1.48<br>(1.06)    | 0.07<br>(0.23)     | -0.12**<br>(0.06)  | -1.22***<br>(0.08) | -0.02<br>(0.46)   | -0.52***<br>(0.08) | -0.34***<br>(0.02) | -0.71***<br>(0.11) | 4.11<br>(2.66)     |
| Years of education of the HH head | 0.07<br>(0.06)     | 0.01<br>(0.01)     | 0.10<br>(0.08)     | 0.00<br>(0.02)     | 0.04***<br>(0.01)  |                    | 0.01<br>(0.02)    | 0.01<br>(0.01)     | 0.04***<br>(0.01)  | -0.01<br>(0.01)    | -0.70<br>(0.49)    |
| Age of the HH head                | -0.00<br>(0.01)    | 0.01***<br>(0.00)  | 0.03<br>(0.03)     | 0.00<br>(0.00)     | 0.02***<br>(0.00)  | -0.01***<br>(0.00) | 0.01<br>(0.01)    | 0.00<br>(0.00)     | 0.01***<br>(0.00)  | -0.01***<br>(0.00) | -0.01<br>(0.03)    |
| Only female adults                | 1.30<br>(0.92)     | 0.59***<br>(0.16)  | 0.75<br>(0.85)     | 0.20<br>(0.36)     | 1.20***<br>(0.18)  | 0.51***<br>(0.08)  | 0.54*<br>(0.31)   | 0.34***<br>(0.07)  | 0.27***<br>(0.10)  | 0.39***<br>(0.09)  | 6.32<br>(4.51)     |
| Only male adults                  | 0.86<br>(0.83)     | 0.23<br>(0.19)     | 1.75<br>(1.80)     | -0.29<br>(0.19)    | 0.45***<br>(0.12)  | 0.44***<br>(0.15)  | 0.08<br>(0.21)    | 0.22*<br>(0.11)    | 0.30***<br>(0.11)  | 0.32***<br>(0.12)  | 8.82<br>(6.34)     |
| $R^2$                             |                    |                    |                    |                    |                    |                    |                   |                    |                    |                    |                    |
| N                                 | 1649               | 2346               | 4399               | 970                | 8296               | 10504              | 666               | 1759               | 2217               | 2204               | 4802               |

Notes: Standard errors in parentheses  
\* $p < 0.10$ , \*\* $p < 0.05$ , \*\*\* $p < 0.01$ .

## References

- W. M. Adams, R. Aveling, D. Brockington, B. Dickson, J. Elliott, J. Hutton, D. Roe, B. Vira, and W. Wolmer. Biodiversity conservation and the eradication of poverty. *science*, 306(5699):1146–1149, 2004.
- C. Barrett, A. Travis, and P. Dasgupta. On biodiversity conservation and poverty traps. *Proceedings of the National Academy of Sciences*, 108(34):13907–13912, 2011.
- J. B. Grace, T. M. Anderson, E. W. Seabloom, E. T. Borer, P. B. Adler, W. S. Harpole, Y. Hautier, H. Hillebrand, E. M. Lind, M. Pärtel, et al. Integrative modelling reveals mechanisms linking productivity and plant species richness. *Nature*, 529(7586):390–393, 2016.
- T. Hasegawa, S. Fujimori, K. Takahashi, and T. Masui. Scenarios for the risk of hunger in the twenty-first century using shared socioeconomic pathways. *Environmental Research Letters*, 10(1):014010, 2015.
- D. Leclère, M. Obersteiner, M. Barrett, and et al. Bending the curve of terrestrial biodiversity needs an integrated strategy. *Nature*, 585:551–556, 2020. doi: <https://doi.org/10.1038/s41586-020-2705-y>.
- J. Liang, T. W. Crowther, N. Picard, S. Wiser, M. Zhou, G. Alberti, E.-D. Schulze, A. D. McGuire, F. Bozzato, H. Pretzsch, et al. Positive biodiversity-productivity relationship predominant in global forests. *Science*, 354(6309): aaf8957, 2016.
- A. Popp, K. Calvin, S. Fujimori, P. Havlik, F. Humpenöder, E. Stehfest, B. L. Bodirsky, J. P. Dietrich, J. C. Doelmann, M. Gusti, T. Hasegawa, P. Kyle, M. Obersteiner, A. Tabeau, K. Takahashi, H. Valin, S. Waldhoff, I. Weindl, M. Wise, E. Kriegler, H. Lotze-Campen, O. Fricko, K. Riahi, and D. P. van Vuuren. Land-use futures in the shared socio-economic pathways. *Global Environmental Change*, 42:331–345, 2017. ISSN 0959-3780. doi: <https://doi.org/10.1016/j.gloenvcha.2016.10.002>.
- M. Springmann, M. Clark, D. Mason-D’Croz, K. Wiebe, B. L. Bodirsky, L. Lassaletta, W. De Vries, S. J. Vermeulen, M. Herrero, K. M. Carlson, et al. Options for keeping the food system within environmental limits. *Nature*, 562(7728):519–525, 2018.
- D. Tilman, C. Balzer, J. Hill, and B. L. Befort. Global food demand and the sustainable intensification of agriculture. *Proceedings of the national academy of sciences*, 108(50):20260–20264, 2011.
- M. van Dijk, M. Gramberger, D. Laborde, M. Mandryk, L. Shutes, E. Stehfest, H. Valin, and K. Faradsch. Stakeholder-designed scenarios for global food security assessments. *Global Food Security*, 24(100352), 2020. doi: <https://doi.org/10.1016/j.gfs.2020.100352>.
- D. Williams, M. Clark, G. Buchanan, F. Fiketola, C. Rondinini, and T. David. Proactive conservation to prevent habitat losses to agricultural expansion. *Nature Sustainability*, 4:314–322, 2021.

S. Wirsenius, C. Azar, and G. Berndes. How much land is needed for global food production under scenarios of dietary changes and livestock productivity increases in 2030? *Agricultural systems*, 103(9):621–638, 2010.
